# Supplementary material for: A photostable fluorescent probe based on PET off for the detection of hydrogen sulfide and its application in bioimaging
Source: Royal Society of Chemistry journal article supplement (doi:10.1039/d0nj01504k), 2020-01-01
Supplement: d0nj01504k1.pdf [file d0nj01504k1.pdf]

## Electronic Supplementary Information

### **A photostable fluorescent probe based on PET off for the detection of hydrogen sulfide and its application in bioimaging**

Jialu Yang <sup>a</sup>, Caixia Yin <sup>a,\*</sup>, Ying Wen <sup>a</sup>, Yongbin Zhang<sup>b</sup>, Fangjun Huo <sup>b,\*</sup>

<sup>a</sup> Key Laboratory of Chemical Biology and Molecular Engineering of Ministry of Education, Institute of Molecular Science, Shanxi University, Taiyuan, 030006, China;

<sup>b</sup> Research Institute of Applied Chemistry, Shanxi University, Taiyuan, 030006, China.

\*E-mail: [yincx@sxu.edu.cn](mailto:yincx@sxu.edu.cn); [huofj@sxu.edu.cn](mailto:huofj@sxu.edu.cn).

#### **Contents:**

#### **I: Material and Methods**

**II: Figure S1:** <sup>1</sup>H MNR (600 MHz) spectrum of **Compound 1** in CD<sub>3</sub>OD and <sup>13</sup>C MNR (150 MHz) spectrum of **Compound 1** in DMSO-*d*<sub>6</sub>.

**Figure S2:** <sup>1</sup>H MNR (600 MHz) spectrum and <sup>13</sup>C MNR (150 MHz) spectrum of **P1** in DMSO-*d*<sub>6</sub>.

**Figure S3:** The HR-MS of (a) **P1** and (b) the mixture reaction product of **P1** and H<sub>2</sub>S.

**Figure S4:** The UV-visible absorption spectra of H<sub>2</sub>S (120 μM) added to the **P1**.

**Figure S5:** Fluorescence intensity of **P1** + Na<sub>2</sub>S (100 μM) / **P1** (10 μM) at 530 nm at different pH conditions.

**Figure S6:** Cell viability estimated by CCK-8 assay with Hela cells.

**Table 1:** Comparison of **P1** and previously reported response time of the same type probes to H<sub>2</sub>S.

## **I: Material and Methods**

### *1.1. Materials and Physical measurements*

All the reagents and solvents were commercially available. Naphthalene-1,6-diol and ethyl acetoacetate were got from Aladdin Industrial Corporation (Shanghai, China). Amino acids were got from Shanghai Experiment Reagent Co., Ltd (Shanghai, China). Fluorescence spectra were recorded by HITACHI F-7000 fluorescence spectrophotometer. Ultraviolet-visible spectra were detected by Hitachi U-3900 UV spectrophotometer. <sup>1</sup>H NMR and <sup>13</sup>C NMR data were obtained by Bruker AVANCE-600 MHz NMR spectrometers (Bruker, Billerica, MA). HR-MS determinations were implemented on an AB SCIEX Tripple TOF5600 Instruments. Nikon Ti-S microsystem was used to evaluate the response of probes to H<sub>2</sub>S in HeLa cells.

**Figure S1:**  $^1\text{H}$  MNR (600 MHz) spectrum of **Compound 1** in  $\text{CD}_3\text{OD}$  and  $^{13}\text{C}$  MNR (150 MHz) spectrum of **Compound 1** in  $\text{DMSO}-d_6$ .

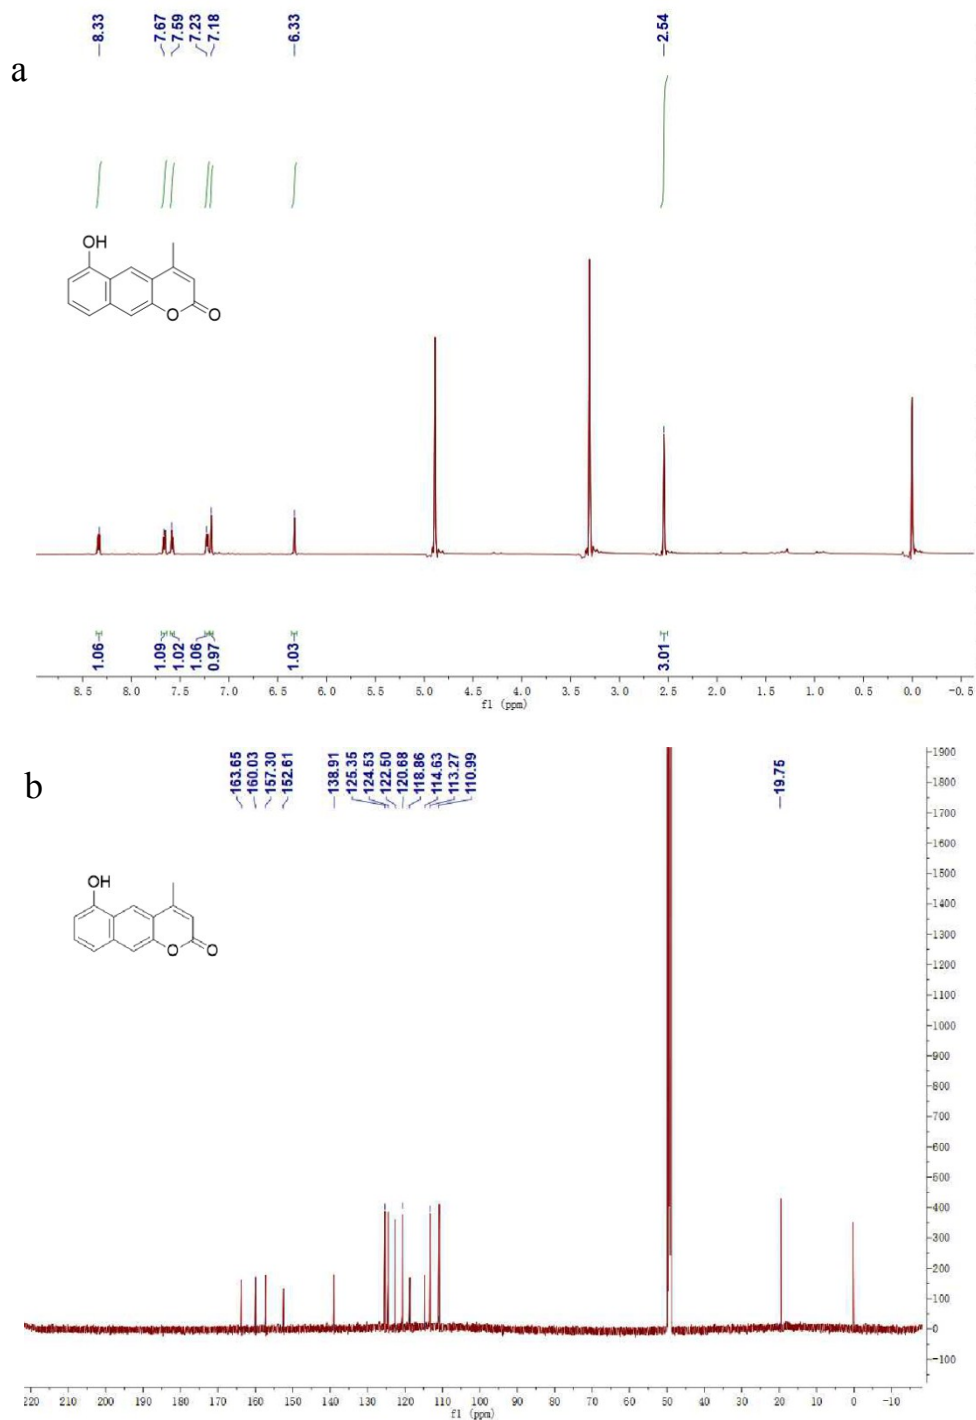

**Figure S1:** (a)  $^1\text{H}$  MNR (600 MHz) spectrum of **Compound 1** in  $\text{MeOD}$ , (b)  $^{13}\text{C}$  MNR (150 MHz) spectrum of **Compound 1** in  $\text{DMSO}-d_6$ .

**Figure S2:**  $^1\text{H}$  MNR (600 MHz) spectrum,  $^{13}\text{C}$  MNR (150 MHz) spectrum of **P1** in DMSO- $d_6$  and the HR-MS of **P1** (c)

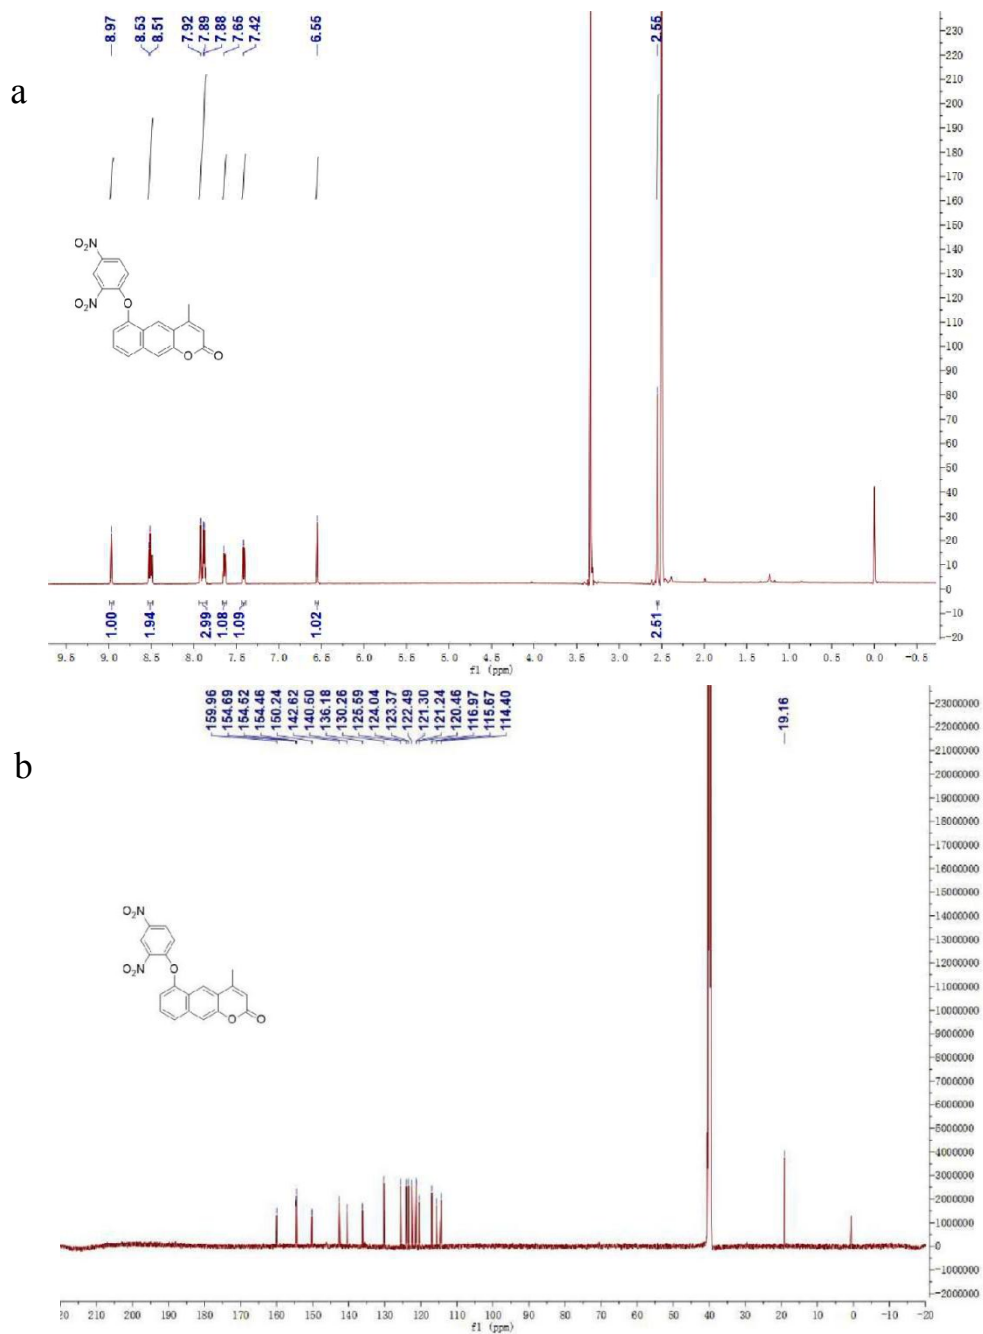

YJL0610 #15-28 RT: 0.16-0.27 AV: 7 NL: 1.34E6  
T: FTMS - p ESI Full ms [150.0000-600.0000]

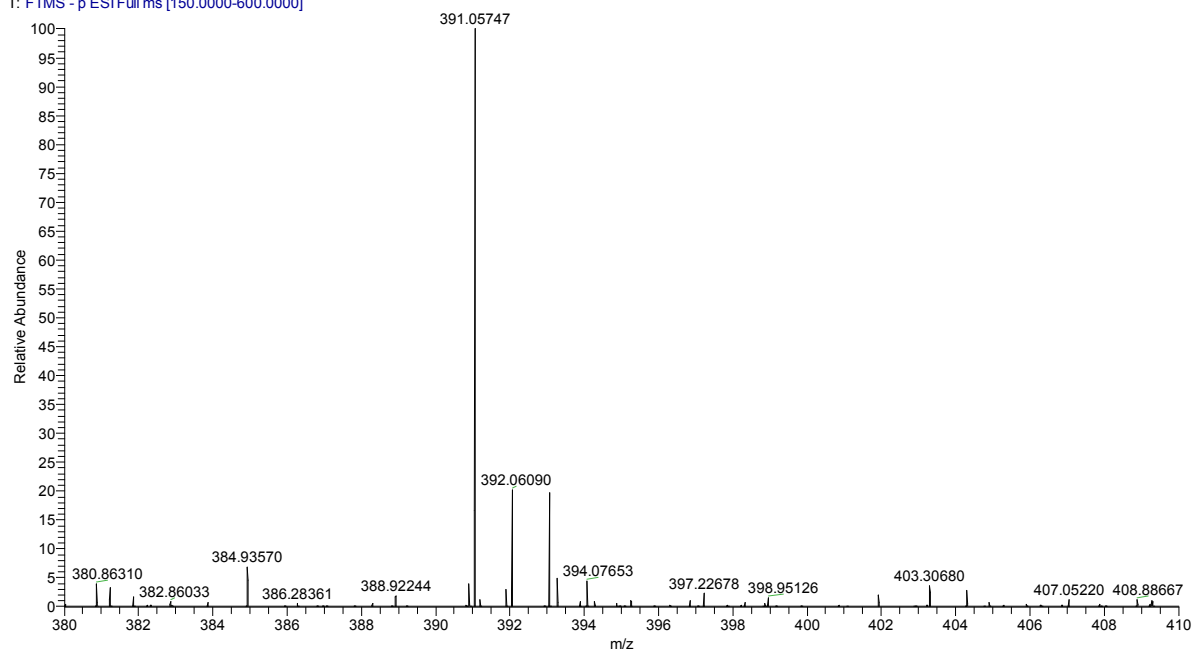

(c)

(a)  $^1\text{H}$  MNR (600 MHz), (b)  $^{13}\text{C}$  MNR (150 MHz) spectra of **P1** in  $\text{DMSO}-d_6$  and (c)

the HR-MS of **P1** (c).

**Figure S3:** The UV-visible absorption spectra of H<sub>2</sub>S (120 μM) added to the **P1**.

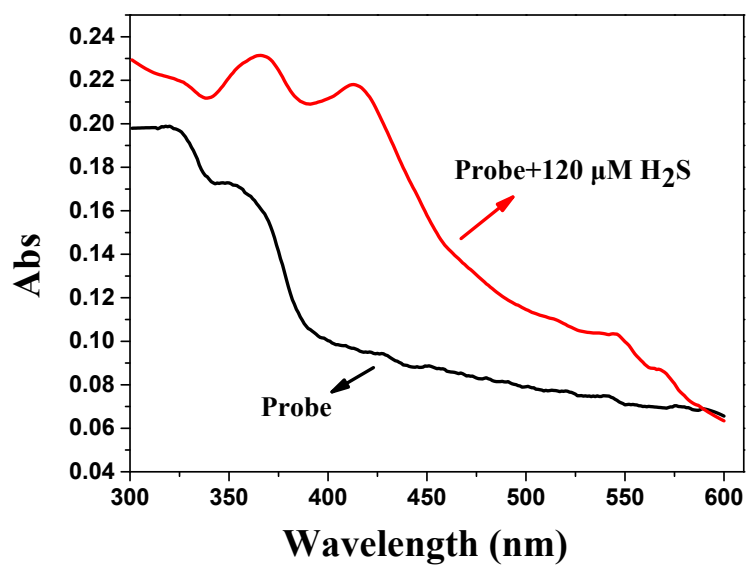

The UV-Vis absorption spectra of **P1** (10 μM) in the absence or presence of Na<sub>2</sub>S (120 μM) in DMSO: PBS=1:1 (v/v, pH = 7.4).

**Figure S4:** Fluorescence intensity of **P1** + Na<sub>2</sub>S (100 μM) / **P1** (10 μM) at 530 nm at different pH conditions.

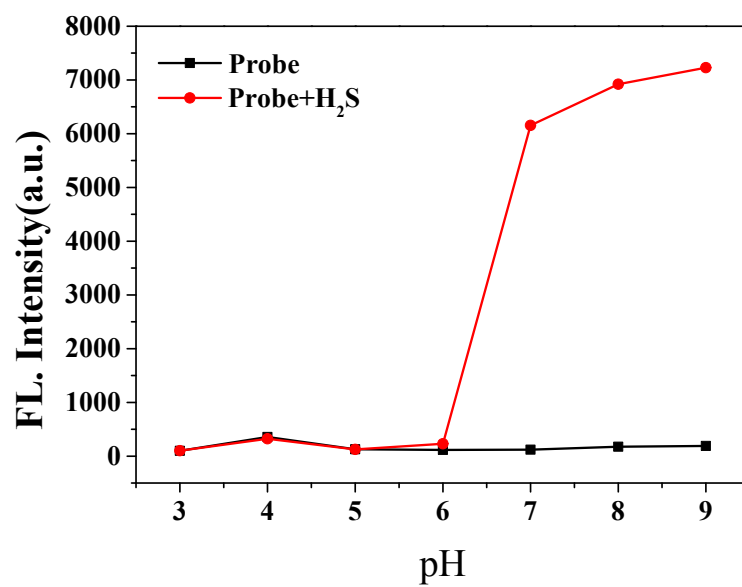

**Figure S5:** The HR-MS of (a) **P1** and (b) the mixture reaction product of **P1** and H<sub>2</sub>S.

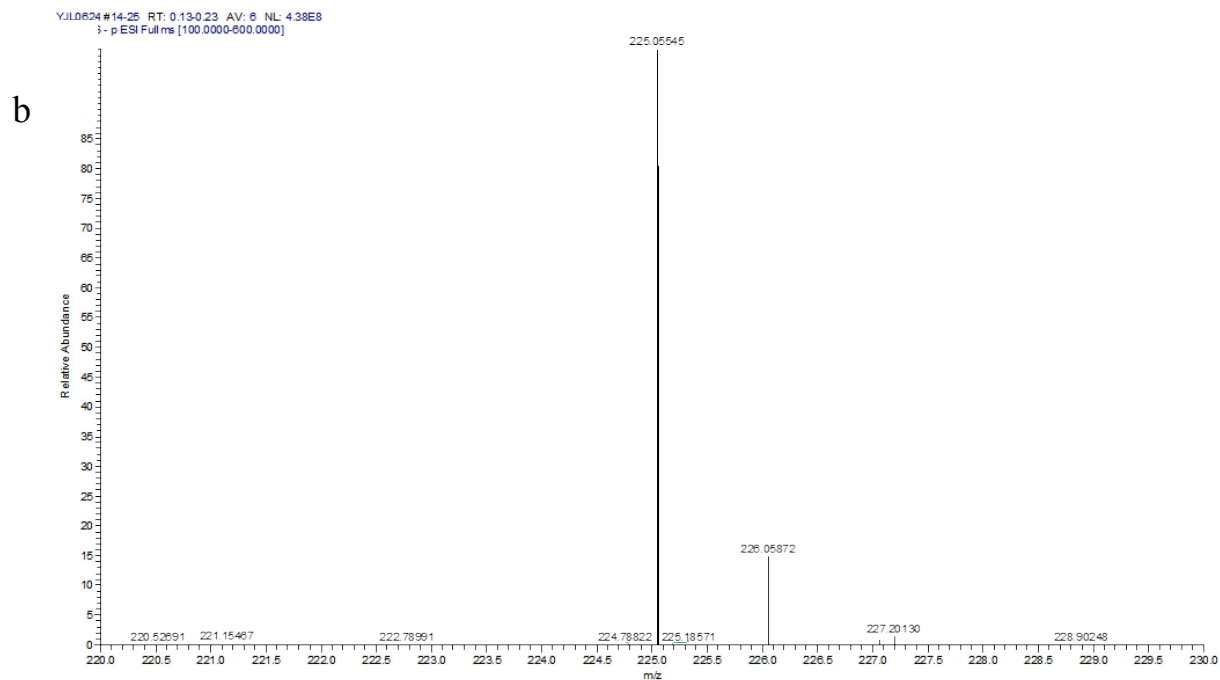



**Figure S6:** Cell viability estimated by CCK-8 assay with RAW 264.7 cells, which were cultured in the presence of 0-20  $\mu\text{M}$  **P1** for 5 and 10 h.

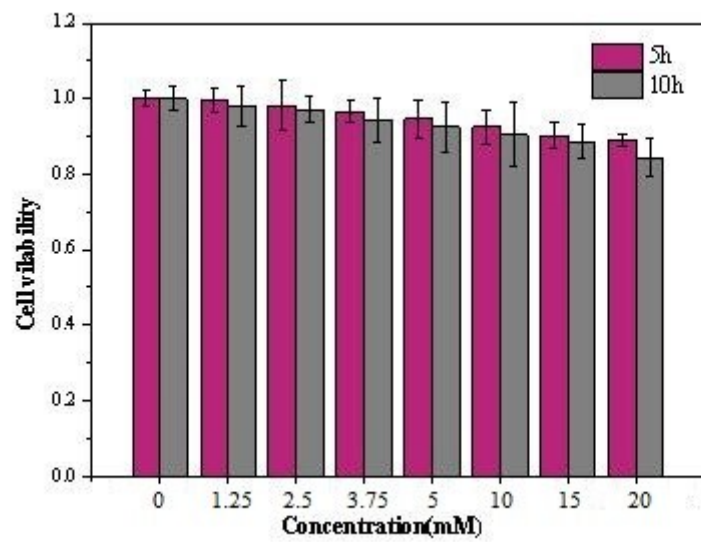

**Table S1:** Comparison of **P1** and previously reported response time of the same type probes to H<sub>2</sub>S.

| Probe   | Structure                                                                           | Excitation and Emission                                    | Reaction time | Probe concentration | Reference |
|---------|-------------------------------------------------------------------------------------|------------------------------------------------------------|---------------|---------------------|-----------|
| Probe 1 | 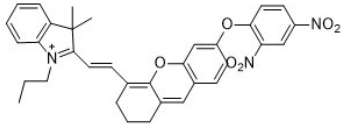   | $\lambda_{em}=723\text{nm}$                                | 20 min        | 10 $\mu\text{M}$    | Ref (27)  |
| Probe 2 |    | $\lambda_{ex}=410\text{nm}$<br>$\lambda_{em}=514\text{nm}$ | 40 min        | 5 $\mu\text{M}$     | Ref (28)  |
| Probe 3 |  | $\lambda_{ex}=574\text{nm}$<br>$\lambda_{em}=592\text{nm}$ | 20 min        | 10 $\mu\text{M}$    | Ref (29)  |
| Probe 4 |  | $\lambda_{ex}=370\text{nm}$<br>$\lambda_{em}=424\text{nm}$ | 180 min       | 30 $\mu\text{M}$    | Ref (30)  |
| Probe 5 |  | $\lambda_{em}=432\text{nm}$                                | 30 min        | 10 $\mu\text{M}$    | Ref (31)  |
| Probe 6 |  | $\lambda_{ex}=403\text{nm}$<br>$\lambda_{em}=502\text{nm}$ | 15 min        | 10 $\mu\text{M}$    | Ref (32)  |

|    |                                                                                   |                                                                          |        |                  |           |
|----|-----------------------------------------------------------------------------------|--------------------------------------------------------------------------|--------|------------------|-----------|
| P1 | 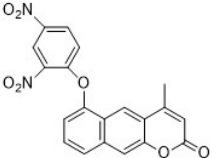 | $\lambda_{\text{ex}}=430\text{nm}$<br>$\lambda_{\text{em}}=530\text{nm}$ | 10 min | 10 $\mu\text{M}$ | This work |
|----|-----------------------------------------------------------------------------------|--------------------------------------------------------------------------|--------|------------------|-----------|
